# Supplementary material for: Repeatability and reproducibility of FreeSurfer, FSL-SIENAX and SPM brain volumetric measurements and the effect of lesion filling in multiple sclerosis
Source: Eur Radiol. 2018 Sep 21;29(3):1355–64. doi: 10.1007/s00330-018-5710-x (PMC6510869; doi:10.1007/s00330-018-5710-x)
Supplement: Supplementary file 1 — (XLSX 60 kb) [file 330_2018_5710_MOESM1_ESM.xlsx]

## Sheet: Sheet1
Supplementary table 1. Volumetric results for all subjects
	FreeSurfer						FSL-SIENAX						SPM						SPM-CAT						LST
	Unnormalized			Normalized			Unnormalized			Normalized			Unnormalized			Normalized			Unnormalized			Normalized
Subject	Brain	WM	GM	Brain	WM	GM	Brain	WM	GM	Brain	WM	GM	Brain	WM	GM	Brain	WM	GM	Brain	WM	GM	Brain	WM	GM	Lesions
MS1 Aera Scan1	1305	577.8	754.2	72.68%	32.17%	42.00%	1384	677.1	706.5	1609	787.3	821.4	1314	500.0	814.3	78.17%	29.74%	48.43%	1321	587	734	75.44%	33.52%	41.92%	0.6437
MS1 Aera Scan2	1311	593.8	744.7	72.70%	32.94%	41.31%	1388	684.3	704.0	1608	792.8	815.6	1312	497.1	815.2	78.02%	29.55%	48.47%	1317	576	741	75.30%	32.93%	42.37%
MS1 Aera Scan1 lesion-filled	1303	580.5	749.7	72.57%	32.32%	41.74%	1383	678.9	704.5	1607	788.8	818.5	1316	502.2	814.2	78.32%	29.88%	48.44%	1323	590	733	75.56%	33.70%	41.86%
MS1 Avanto Scan1	1292	568.1	750.6	72.99%	32.10%	42.41%	1403	685.9	716.6	1587	775.9	810.6	1295	492.8	801.9	77.47%	29.49%	47.98%	1307	569	738	74.73%	32.53%	42.20%	0.8273
MS1 Avanto Scan2	1286	563.9	749.2	72.66%	31.86%	42.33%	1396	682.7	713.8	1578	771.5	806.6	1295	493.6	801.0	77.47%	29.54%	47.93%	1304	568	736	74.51%	32.46%	42.06%
MS1 Avanto Scan1 lesion-filled	1290	567.5	749.7	72.86%	32.06%	42.35%	1398	684.5	713.3	1587	777.1	809.9	1296	492.5	803.9	77.61%	29.49%	48.13%	1307	570	737	74.73%	32.59%	42.14%
MS1 Trio Scan1	1249	557.7	717.7	72.06%	32.18%	41.42%	1325	660.3	665.0	1536	765.5	771.0	1262	462.8	799.1	77.70%	28.50%	49.20%	1270	551	719	76.09%	33.01%	43.08%	2.6839
MS1 Trio Scan2	1252	567.4	710.1	71.92%	32.61%	40.80%	1324	655.8	668.1	1538	761.7	776.0	1263	463.9	798.7	76.91%	28.26%	48.65%	1268	549	719	73.85%	31.97%	41.88%
MS1 Trio Scan1 lesion-filled	1247	557.2	717.1	72.01%	32.16%	41.39%	1325	660.9	664.1	1536	766.1	769.8	1262	459.2	802.4	77.73%	28.29%	49.44%	1271	552	719	76.15%	33.07%	43.08%
MS2 Aera Scan1	1291	595.3	722.6	70.41%	32.46%	39.41%	1365	693.8	670.8	1632	829.9	802.5	1262	475.0	787.4	76.44%	28.76%	47.68%	1282	577	705	73.09%	32.90%	40.19%	3.3812
MS2 Aera Scan2	1300	605.8	722.6	70.67%	32.94%	39.29%	1364	693.4	670.7	1629	828.3	801.1	1262	472.7	789.2	76.49%	28.65%	47.84%	1283	576	707	73.27%	32.90%	40.38%
MS2 Aera Scan1 lesion-filled	1298	600.0	725.4	70.88%	32.75%	39.60%	1363	697.7	665.5	1631	834.9	796.4	1266	480.5	785.9	76.67%	29.09%	47.58%	1284	581	703	73.25%	33.14%	40.10%
MS2 Avanto Scan1	1272	590.4	710.6	70.16%	32.57%	39.20%	1349	667.4	681.8	1591	787.2	804.2	1250	460.7	789.7	76.53%	28.20%	48.33%	1262	553	709	71.75%	31.44%	40.31%	3.8619
MS2 Avanto Scan2	1266	566.5	729.5	69.84%	31.25%	40.24%	1349	667.1	681.8	1583	783.0	800.3	1251	462.3	788.7	76.43%	28.25%	48.19%	1267	557	710	72.03%	31.67%	40.36%
MS2 Avanto Scan1 lesion-filled	1269	581.4	717.3	70.13%	32.12%	39.63%	1348	668.8	679.2	1591	789.2	801.5	1257	462.7	793.9	76.96%	28.34%	48.62%	1266	557	709	71.97%	31.67%	40.31%
MS2 Trio Scan1	1229	567.9	686.4	70.28%	32.48%	39.26%	1300	658.0	642.2	1582	800.4	781.2	1213	430.2	782.8	76.38%	27.09%	49.29%	1224	532	692	73.03%	31.74%	41.29%	6.7148
MS2 Trio Scan2	1227	554.1	702.5	69.69%	31.46%	39.89%	1306	655.2	651.1	1601	803.2	798.1	1225	435.6	788.9	76.36%	27.16%	49.20%	1224	535	689	71.96%	31.45%	40.51%
MS2 Trio Scan1 lesion-filled	1222	564.5	683.3	69.97%	32.31%	39.11%	1299	658.8	640.0	1576	799.6	776.7	1219	429.8	789.2	76.79%	27.07%	49.71%	1227	535	692	73.21%	31.92%	41.29%
MS3 Aera Scan1	1100	509.9	615.7	69.24%	32.08%	38.74%	1255	646.1	608.7	1280	659.0	620.9	1097	453.9	642.7	68.70%	28.43%	40.26%	1103	518	585	66.53%	31.24%	35.28%	4.7438
MS3 Aera Scan2	1105	509.5	620.7	69.31%	31.96%	38.94%	1235	637.4	597.8	1309	675.4	633.5	1110	462.8	647.0	69.22%	28.87%	40.35%	1117	522	595	66.53%	31.09%	35.44%
MS3 Aera Scan1 lesion-filled	1099	509.8	614.9	69.20%	32.10%	38.71%	1248	647.0	601.1	1289	668.1	620.7	1106	463.5	642.6	69.38%	29.07%	40.31%	1110	528	582	66.99%	31.86%	35.12%
MS3 Avanto Scan1	1102	524.9	601.6	70.57%	33.62%	38.54%	1217	611.8	605.5	1480	743.6	735.9	1098	451.2	647.2	69.15%	28.40%	40.74%	1112	503	609	66.59%	30.12%	36.47%	5.0523
MS3 Avanto Scan2	1104	533.4	595.1	70.70%	34.17%	38.12%	1294	664.0	629.8	1312	673.2	638.5	1099	458.4	641.0	69.28%	28.89%	40.39%	1111	513	598	66.69%	30.79%	35.89%
MS3 Avanto Scan1 lesion-filled	1103	522.5	605.8	70.79%	33.53%	38.88%	1205	609.6	595.0	1526	772.1	753.6	1107	461.0	646.1	69.76%	29.05%	40.71%	1118	513	605	66.99%	30.74%	36.25%
MS3 Trio Scan1	1052	488.2	588.4	68.36%	31.73%	38.24%	1126	565.1	561.4	1510	757.6	752.5	1052	415.6	636.2	67.39%	26.63%	40.76%	1061	478	583	64.93%	29.25%	35.68%	6.7482
MS3 Trio Scan2	1046	485.8	584.4	68.18%	31.68%	38.11%	1129	571.2	558.1	1505	761.4	744.0	1050	416.6	633.1	67.16%	26.65%	40.50%	1061	474	587	65.13%	29.10%	36.03%
MS3 Trio Scan1 lesion-filled	1053	496.4	581.4	68.47%	32.29%	37.81%	1126	569.7	556.4	1508	762.9	745.1	1063	424.7	638.0	68.20%	27.26%	40.95%	1067	485	582	65.46%	29.75%	35.71%
MS4 Aera Scan1	1298	636.0	691.4	65.71%	32.20%	35.01%	1381	714.5	666.3	1573	814.0	759.1	1274	448.8	825.6	74.79%	26.34%	48.45%	1216	552	664	67.44%	30.62%	36.83%	11.4857
MS4 Aera Scan2	1308	650.2	687.4	66.10%	32.87%	34.74%	1380	708.3	671.6	1583	812.7	770.5	1270	447.5	822.7	74.49%	26.24%	48.24%	1225	555	670	67.49%	30.58%	36.91%
MS4 Aera Scan1 lesion-filled	1299	628.7	696.5	65.89%	31.90%	35.34%	1375	709.3	665.8	1570	809.9	760.2	1283	462.9	819.8	75.32%	27.18%	48.14%	1226	572	654	68.00%	31.72%	36.27%
MS4 Avanto Scan1	1275	620.9	683.7	65.78%	32.02%	35.26%	1361	702.2	658.4	1543	796.4	746.7	1240	435.2	805.1	73.40%	25.75%	47.64%	1227	550	677	68.28%	30.61%	37.67%	17.9532
MS4 Avanto Scan2	1270	612.5	686.4	65.47%	31.57%	35.38%	1363	708.8	653.7	1550	806.6	743.9	1235	436.7	797.9	73.08%	25.85%	47.23%	1228	554	674	68.30%	30.81%	37.49%
MS4 Avanto Scan1 lesion-filled	1285	633.0	680.7	66.32%	32.66%	35.12%	1359	694.1	664.5	1540	787.1	753.4	1257	455.3	801.7	74.45%	26.97%	47.49%	1243	572	671	69.13%	31.81%	37.32%
MS4 Trio Scan1	1230	612.5	645.9	66.51%	33.13%	34.93%	1309	679.5	629.5	1493	775.2	718.1	1209	419.8	789.4	73.49%	25.51%	47.97%	1205	539	666	68.47%	30.63%	37.84%	23.9885
MS4 Trio Scan2	1229	612.1	645.2	66.13%	32.94%	34.72%	1314	680.1	633.7	1504	778.5	725.3	1219	421.3	797.9	74.03%	25.58%	48.45%	1212	544	668	68.82%	30.89%	37.93%
MS4 Trio Scan1 lesion-filled	1228	608.6	647.5	66.42%	32.92%	35.02%	1305	682.7	622.5	1494	781.6	712.7	1211	416.7	794.5	73.65%	25.34%	48.31%	1206	547	659	68.52%	31.08%	37.44%
MS5 Aera Scan1	1252	549.5	724.6	72.16%	31.66%	41.76%	1317	593.9	722.8	1618	729.6	888.0	1261	458.6	802.7	84.31%	30.65%	53.65%	1258	536	722	80.74%	34.40%	46.34%	1.2502
MS5 Aera Scan2	1260	543.8	740.0	72.53%	31.31%	42.60%	1317	587.5	729.5	1606	716.6	889.8	1259	457.5	801.9	84.22%	30.59%	53.62%	1264	545	719	81.18%	35.00%	46.18%
MS5 Aera Scan1 lesion-filled	1248	549.0	721.5	71.96%	31.65%	41.59%	1316	595.3	721.0	1614	729.8	884.0	1264	462.8	801.3	84.52%	30.94%	53.58%	1259	539	720	80.86%	34.62%	46.24%
MS5 Avanto Scan1	1235	543.5	714.1	72.88%	32.06%	42.12%	1309	590.8	718.3	1574	710.6	863.9	1235	444.0	790.6	83.08%	29.88%	53.20%	1239	521	718	79.37%	33.38%	46.00%	1.4596
MS5 Avanto Scan2	1232	530.5	725.6	72.65%	31.28%	42.78%	1308	592.4	716.1	1571	711.4	860.0	1232	444.0	788.0	82.86%	29.86%	53.00%	1238	524	714	79.36%	33.59%	45.77%
MS5 Avanto Scan1 lesion-filled	1234	542.2	715.5	72.81%	31.99%	42.22%	1308	591.1	716.7	1572	710.6	861.7	1238	446.4	791.4	83.33%	30.05%	53.27%	1242	524	718	79.56%	33.57%	46.00%
MS5 Trio Scan1	1184	521.9	685.6	72.69%	32.04%	42.10%	1257	621.4	635.1	1600	791.4	808.8	1196	415.5	780.0	82.35%	28.62%	53.73%	1195	507	688	78.83%	33.44%	45.38%	1.7662
MS5 Trio Scan2	1194	530.2	686.1	73.12%	32.46%	42.01%	1268	623.7	644.5	1623	798.3	824.9	1205	420.3	784.3	82.58%	28.81%	53.77%	1202	507	695	78.77%	33.22%	45.54%
MS5 Trio Scan1 lesion-filled	1180	523.5	680.7	72.56%	32.18%	41.84%	1255	622.7	632.7	1601	794.2	806.8	1197	418.0	778.9	82.45%	28.79%	53.65%	1195	509	686	78.88%	33.60%	45.28%
MS6 Aera Scan1	1141	498.3	666.1	74.06%	32.34%	43.23%	1214	541.6	672.1	1779	793.7	985.0	1167	414.2	753.1	88.15%	31.28%	56.87%	1161	489	672	84.68%	35.67%	49.02%	0.3332
MS6 Aera Scan2	1137	497.3	664.4	73.70%	32.22%	43.05%	1216	551.4	664.6	1787	810.3	976.6	1162	415.3	746.6	87.47%	31.26%	56.20%	1156	487	669	84.13%	35.44%	48.69%
MS6 Aera Scan1 lesion-filled	1139	501.4	661.9	73.98%	32.56%	42.99%	1213	542.1	670.9	1782	796.2	985.4	1168	414.5	753.4	88.21%	31.31%	56.90%	1161	489	672	84.62%	35.64%	48.98%
MS6 Avanto Scan1	1126	492.0	659.3	74.29%	32.45%	43.48%	1202	538.8	663.3	1771	793.8	977.3	1141	402.3	738.7	86.71%	30.57%	56.14%	1142	476	666	83.48%	34.80%	48.68%	0.3744
MS6 Avanto Scan2	1122	496.1	651.5	73.98%	32.71%	42.95%	1204	545.8	657.8	1779	806.9	972.5	1143	403.1	740.0	86.91%	30.65%	56.27%	1137	476	661	83.30%	34.87%	48.42%
MS6 Avanto Scan1 lesion-filled	1127	495.0	657.9	74.35%	32.66%	43.41%	1202	539.3	662.5	1768	793.5	974.8	1142	403.3	738.7	86.79%	30.65%	56.14%	1141	475	666	83.41%	34.72%	48.68%
MS6 Trio Scan1	1064	484.0	604.4	73.76%	33.55%	41.89%	1150	547.2	603.2	1693	805.3	887.7	1096	372.0	723.8	84.99%	28.85%	56.14%	1099	456	643	81.95%	34.00%	47.95%	0.4747
MS6 Trio Scan2	1082	490.3	615.8	74.50%	33.76%	42.40%	1167	544.8	622.2	1717	801.5	915.4	1107	372.9	733.9	85.65%	28.86%	56.79%	1102	456	646	82.12%	34.00%	48.14%
MS6 Trio Scan1 lesion-filled	1066	490.1	599.4	73.95%	33.99%	41.57%	1150	547.6	602.3	1689	804.1	884.5	1096	372.3	724.0	85.03%	28.88%	56.15%	1099	457	642	81.95%	34.08%	47.87%
MS7 Aera Scan1	1220	582.0	664.4	75.13%	35.83%	40.90%	1300	661.3	638.9	1591	809.1	781.7	1200	470.9	729.4	81.01%	31.78%	49.23%	1195	562	633	77.80%	36.59%	41.21%	2.1125
MS7 Aera Scan2	1213	572.6	666.4	74.53%	35.18%	40.94%	1299	655.6	643.2	1585	800.1	784.9	1199	473.5	725.7	80.94%	31.96%	48.98%	1195	562	633	77.90%	36.64%	41.26%
MS7 Aera Scan1 lesion-filled	1217	579.6	663.7	74.95%	35.68%	40.87%	1299	662.8	636.3	1599	816.1	783.4	1203	477.0	725.5	81.18%	32.20%	48.98%	1197	567	630	77.93%	36.91%	41.02%
MS7 Avanto Scan1	1198	575.7	649.0	75.05%	36.07%	40.66%	1282	644.6	637.7	1534	771.3	763.1	1179	461.0	717.5	79.93%	31.27%	48.66%	1177	540	637	76.98%	35.32%	41.66%	4.1414
MS7 Avanto Scan2	1201	586.8	639.8	75.04%	36.67%	39.98%	1293	666.9	626.3	1545	796.7	748.2	1198	473.6	724.7	81.54%	32.23%	49.32%	1183	548	635	77.32%	35.82%	41.50%
MS7 Avanto Scan1 lesion-filled	1201	580.5	646.8	75.20%	36.36%	40.51%	1280	645.0	635.4	1530	770.7	759.2	1180	464.3	715.7	80.07%	31.51%	48.56%	1179	545	634	77.11%	35.64%	41.47%
MS7 Trio Scan1	1151	547.3	629.6	74.47%	35.42%	40.75%	1231	618.7	612.1	1496	752.0	744.0	1159	420.9	737.8	80.25%	29.15%	51.10%	1151	512	639	76.99%	34.25%	42.74%	4.5962
MS7 Trio Scan2	1155	543.0	638.3	74.33%	34.96%	41.09%	1243	629.0	614.2	1507	762.3	744.4	1162	424.5	737.8	80.54%	29.41%	51.12%	1152	514	638	77.16%	34.43%	42.73%
MS7 Trio Scan1 lesion-filled	1154	549.9	631.2	74.75%	35.61%	40.88%	1231	621.8	609.6	1497	755.9	741.1	1161	424.9	736.3	80.44%	29.43%	51.00%	1152	516	636	77.06%	34.52%	42.54%
MS8 Aera Scan1	1238	584.1	682.7	70.08%	33.06%	38.64%	1279	645.4	633.8	1558	785.9	771.8	1216	504.5	711.2	78.38%	32.53%	45.85%	1211	576	635	76.12%	36.20%	39.91%	0.3435
MS8 Aera Scan2	1237	593.8	671.4	69.86%	33.54%	37.92%	1279	647.3	632.1	1554	786.5	768.0	1221	509.1	712.3	78.74%	32.82%	45.92%	1217	582	635	75.50%	36.10%	39.39%
MS8 Aera Scan1 lesion-filled	1232	581.1	680.0	69.76%	32.89%	38.49%	1279	646.0	632.8	1555	785.7	769.7	1217	505.6	711.7	78.49%	32.60%	45.89%	1212	577	635	76.18%	36.27%	39.91%
MS8 Avanto Scan1	1218	580.1	666.8	69.94%	33.30%	38.27%	1279	642.3	637.1	1554	780.1	773.7	1210	497.8	711.9	78.56%	32.33%	46.23%	1213	564	649	75.15%	34.94%	40.21%	0.4054
MS8 Avanto Scan2	1220	579.5	668.9	69.93%	33.20%	38.32%	1277	643.2	633.9	1556	783.7	772.4	1208	497.9	710.2	78.37%	32.30%	46.07%	1213	565	648	75.15%	35.01%	40.15%
MS8 Avanto Scan1 lesion-filled	1219	585.9	661.2	69.94%	33.63%	37.95%	1279	642.5	636.7	1553	779.9	772.9	1211	498.2	713.1	78.68%	32.36%	46.32%	1214	565	649	75.17%	34.98%	40.19%
MS8 Trio Scan1	1174	568.3	631.9	70.85%	34.28%	38.12%	1230	620.9	609.5	1526	769.9	755.8	1173	456.8	716.4	77.58%	30.21%	47.37%	1165	534	631	74.20%	34.01%	40.19%	0.7076
MS8 Trio Scan2	1177	567.4	637.3	70.91%	34.19%	38.41%	1233	619.6	613.2	1528	767.8	759.9	1178	457.5	720.5	77.80%	30.21%	47.58%	1175	538	637	74.41%	34.07%	40.34%
MS8 Trio Scan1 lesion-filled	1175	566.4	636.4	70.89%	34.18%	38.40%	1228	621.3	606.7	1525	771.4	753.2	1174	456.6	717.0	77.61%	30.19%	47.41%	1166	535	631	74.27%	34.08%	40.19%
MS9 Aera Scan1	1240	527.2	739.2	73.80%	31.37%	43.98%	1330	595.8	734.1	1753	785.3	967.5	1277	453.3	823.6	91.48%	32.48%	59.01%	1262	522	740	87.70%	36.28%	51.42%	0.5807
MS9 Aera Scan2	1234	524.3	735.6	73.23%	31.11%	43.65%	1333	597.1	736.0	1737	777.9	958.8	1278	453.5	824.9	91.58%	32.49%	59.09%	1265	525	740	87.97%	36.51%	51.46%
MS9 Aera Scan1 lesion-filled	1246	529.4	743.1	74.07%	31.48%	44.18%	1332	597.7	734.3	1730	776.2	953.7	1278	454.0	823.8	91.49%	32.51%	58.99%	1263	524	739	87.77%	36.41%	51.36%
MS9 Avanto Scan1	1223	526.9	722.6	73.50%	31.65%	43.41%	1348	613.2	734.9	1587	721.9	865.1	1259	451.0	807.8	90.08%	32.27%	57.81%	1248	514	734	86.73%	35.72%	51.01%	0.7272
MS9 Avanto Scan2	1226	517.7	734.7	73.65%	31.09%	44.13%	1344	609.8	734.1	1620	735.2	885.1	1258	448.2	809.5	89.86%	32.02%	57.84%	1248	513	735	86.85%	35.70%	51.15%
MS9 Avanto Scan1 lesion-filled	1227	527.6	725.2	73.69%	31.70%	43.57%	1348	613.3	734.4	1596	726.2	869.7	1260	451.5	808.4	90.18%	32.32%	57.86%	1249	516	733	86.80%	35.86%	50.94%
MS9 Trio Scan1	1184	519.9	689.8	75.47%	33.15%	43.98%	1273	614.4	659.1	1675	808.0	866.8	1220	411.2	808.9	89.16%	30.05%	59.11%	1208	491	717	86.35%	35.10%	51.25%	0.6101
MS9 Trio Scan2	1194	519.4	701.4	75.75%	32.95%	44.50%	1281	603.9	677.6	1702	801.9	899.8	1225	415.2	810.2	89.55%	30.34%	59.21%	1216	494	722	86.92%	35.31%	51.61%
MS9 Trio Scan1 lesion-filled	1185	508.3	703.2	75.56%	32.41%	44.83%	1273	615.9	657.5	1676	810.5	865.2	1220	411.8	808.6	89.19%	30.10%	59.10%	1209	493	716	86.48%	35.26%	51.22%
All volumes are given as milliliters and the normalized tissue fractions of FreeSurfer, SPM and SPM-CAT are given as unit-less tissue fractions in %.
CAT = Computational Anatomy Toolbox, FSL-SIENAX = FMRIB Software Library Structural Image Evaluation with Normalisation of Atrophy Cross-sectional, GM = Grey Matter, n.s. = non-significant, SPM = Statistical Parametric Mapping, WM = White Matter.
